# Supplementary material for: Emergence of plasmid stability under non-selective conditions maintains antibiotic resistance
Source: PubMed Central journal article supplement (PMC6565834; doi:10.1038/s41467-019-10600-7), 2019-06-13
Supplement: 41467_2019_10600_MOESM1_ESM.pdf [file 41467_2019_10600_MOESM1_ESM.pdf]

## **Supplementary information**

**Emergence of plasmid stability under non-selective conditions maintains antibiotic resistance**

Wein et al.

## Supplementary figures

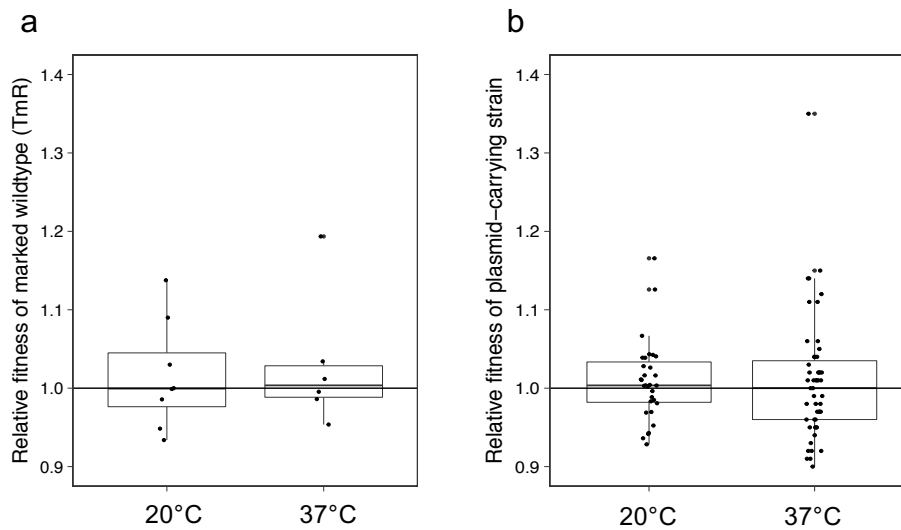

**Supplementary Figure 1.** Competition experiments to quantify the effect on the host fitness. **a**, Pairwise competition experiments between *E. coli* MG1655 wildtype and a chromosomally marked wildtype (Tm<sup>r</sup>). **b**, Pairwise competition experiments between the plasmid-carrying (pCON) *E. coli* MG1655 and the marked wildtype (Tm<sup>r</sup>). The experiments were conducted for 24h at 20°C and 37°C with eight biological replicates, including four technical replicates at 20°C (n=32) and eight replicates at 37°C (n=64). No significant fitness effect could be observed (20°C,  $w: 1.001$ ,  $H_0: w \geq 1$ ,  $P=0.009625$  using Wilcoxon test; 37°C,  $w: 0.98$ ,  $H_0: w \geq 1$ ,  $P=0.0147$  using Wilcoxon test). Moreover, the relative fitness was not significantly different between the temperatures ( $P=0.07699$  using Wilcoxon test). The fitness experiments were performed measuring cell numbers for both marker types (wt: Tm<sup>r</sup> and plasmid: Km<sup>r</sup>). We did not observe a difference between the calculated (derived from chromosomal marker Tm<sup>r</sup>) and measured plasmid marker Km<sup>r</sup> ( $P=0.1914$  using Wilcoxon-test). The center value of the boxplots represents the median, the boxes denote the interquartile range, and the whiskers represent minimum and maximum values. Source data are provided as a Source Data File.

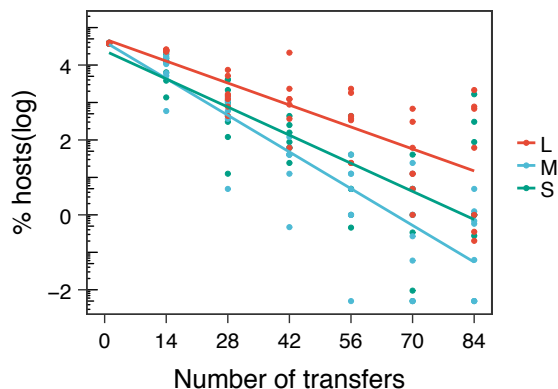

**Supplementary Figure 2.** Linear regression of pCON host dynamics at 37°C. Replicates of the evolution experiment were pooled according to the population bottleneck treatment and log transformed prior to fitting a linear regression.

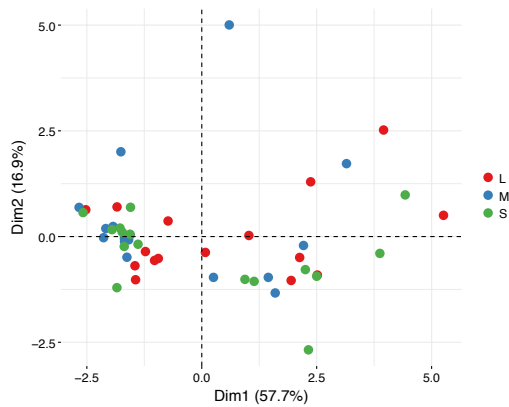

**Supplementary Figure 3.** Principal component analysis (PCA) of the pCON persistence over time comparing among population bottleneck sizes.

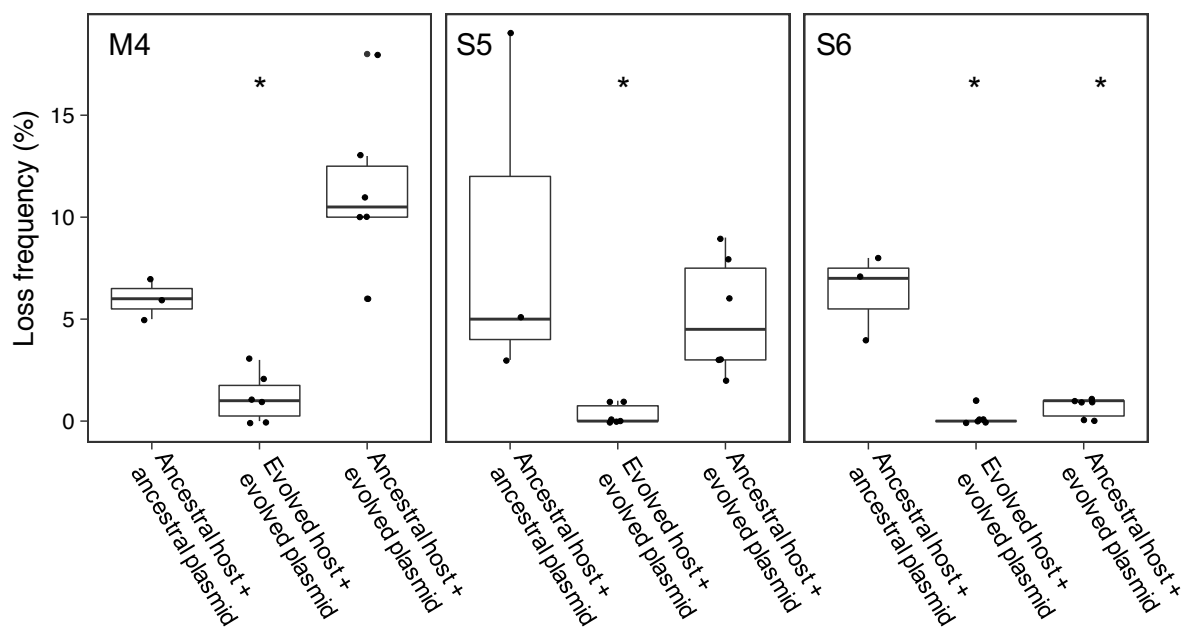

**Supplementary Figure 4.** Plasmid loss frequency of pCON populations in the follow-up evolution experiment. The plasmid loss was evaluated after overnight growth by measuring the number of plasmid segregants. Plasmid loss assays were conducted for the ancestral populations as well as for the evolved populations of population M4, S5 and S6. The evolved plasmid was introduced to the ancestral host and the loss was measured subsequently ( $n=3$ ,  $n=6$ ). The star indicates a significant difference in comparison to the ancestral loss frequency ( $<0.05$  using Wilcoxon test). The center value of the boxplots represents the median, the boxes denote the interquartile range, and the whiskers represent minimum and maximum values. Source data are provided as a Source Data File.

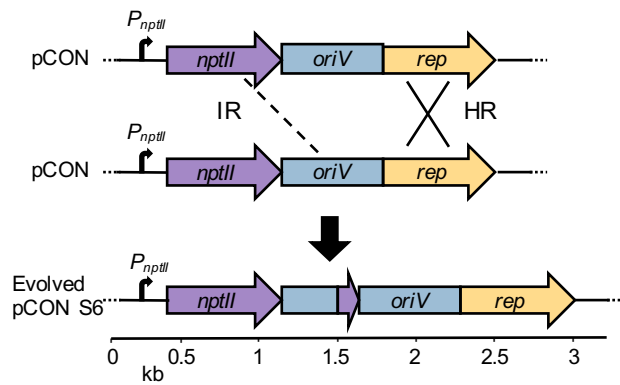

**Supplementary Figure 5.** Recombination event that led to the segmental duplication in pCON plasmids from population S6. The insertion was formed at a microhomologous region between *nptII* and the *oriV* through an illegitimate recombination event (IR, dashed line) that probably succeeded a distant homologous recombination event (HR) between two copies of pCON.

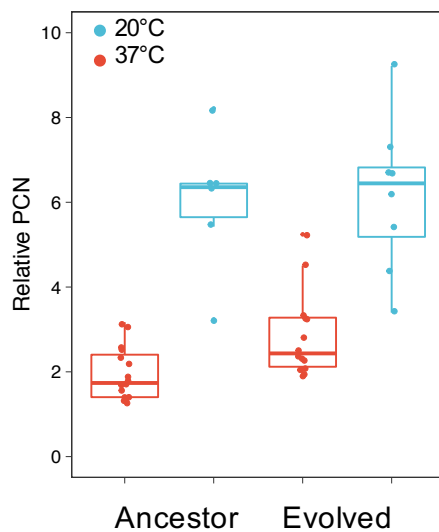

**Supplementary Figure 6.** Plasmid copy number of pCON plasmids. The plasmid copy number (PCN) was measured with quantitative PCR and calculated relative to the chromosomal gene *idnT*. The PCN for the evolved populations was evaluated from the stable population S6 at 37°C (n=16) and population L2 at 20°C (n=8). The center value of the boxplots represents the median, the boxes denote the interquartile range, and the whiskers represent minimum and maximum values. Source data are provided as a Source Data File.

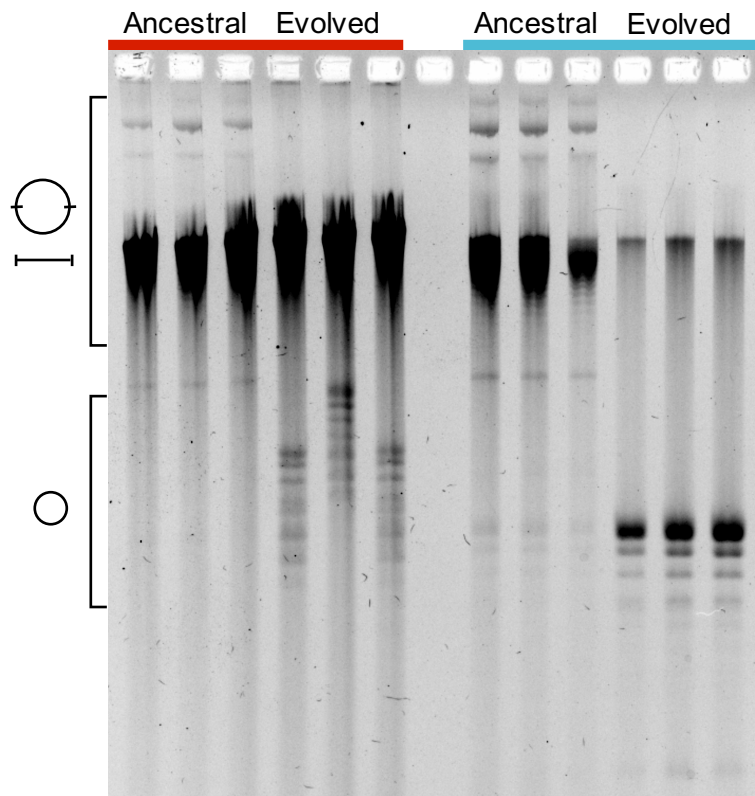

**Supplementary Figure 7.** Separation of pCON plasmid preparations by one-dimensional agarose gel electrophoresis in the presence of chloroquine (4  $\mu\text{g}$  per ml). Plasmid preparations of ancestral and evolved populations grown at 37°C (red) and 20°C (blue). Symbols indicate plasmid topoisomers of multimers (large circle) and monomers (small circle) as well as linear DNA.

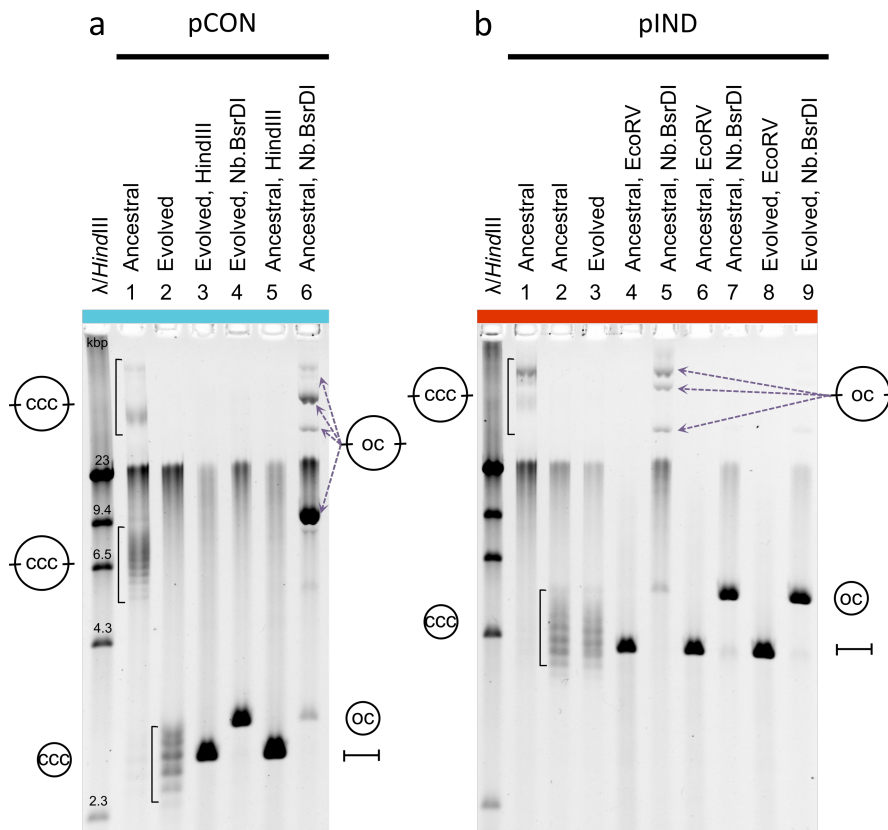

**Supplementary Figure 8.** Plasmid monomers and multimers identified by one-dimensional gel electrophoresis. Representative plasmid preparations of pCON and pIND were analysed by gel electrophoresis in the presence of chloroquine (4  $\mu\text{g}$  per ml). The plasmids presented here were prepared from ancestral and evolved host lines from the 20°C (blue bar) and 37°C (red bar) regime. Plasmid DNAs were nicked with Nb.BsrDI to create relaxed open circular (oc) plasmid molecules. Linear monomer fragments were produced by digesting pCON with HindIII and pIND with EcoRV. Because chloroquine alters the relative mobility of circular DNA fragments during electrophoresis depending on the topology, linearized lambda DNA ( $\lambda$ ) was included for a rough approximation but not as an accurate size standard. **a**, The vast differences in the relative mobility of the dominating fraction of topoisomers of pCON in the ancestral state (lane 1) and at the end of the evolution experiment (lane 2) are explained by a dominating pCON multimer (lane 6) and not caused by different degrees of superhelicity. Note that the dominating oc form of the ancestral pCON multimer (lane 6) migrates close to the position of the first relaxed topoisomer of this multimer visible in lane 1. The treatment with HindIII converts all multimeric forms into linear molecules (lane 5). In addition to the dominating multimeric form, even larger multimeric forms of pCON exist *in vivo* in the ancestral lines at 20°C (i.e., slow migrating bands of oc multimer molecules (lane 6) that are not resolved when still supercoiled in lane 1). In contrast, pCON prepared from evolved lines appeared in a monomeric state (lane 3) as confirmed after nicking (lane 4) and linearization (lane 5). **b**, Preparations of pIND from ancestral lines were either dominated by large plasmid multimers of different size (lane 1) or monomers (lane 2). Large multimers could not be resolved into topoisomers, but formed sharp bands after nicking (lane 5). Preparations of pIND from host lines after experimental evolution revealed uniformly that pIND was maintained *in vivo* in its monomeric state (lane 3). Nicking and linearization of pIND topoisomers from ancestral and evolved lines that maintained plasmids monomers revealed no differences (lanes 8 and 9). **Supplementary methods for Supplementary Figure 8:** Plasmids were isolated from overnight cultures grown without antibiotic selection at 20°C or 37°C using the GeneJET Plasmid Miniprep kit (Thermo Fisher Scientific). Enzymatic reactions were performed according to the manufacturers' guidelines (New England Biolabs). The samples were electrophoresed in a 0.7% (w/v) agarose gel for 700 to 900 min at 1.8 V/cm. Staining and image acquisition were performed as described in the main text.

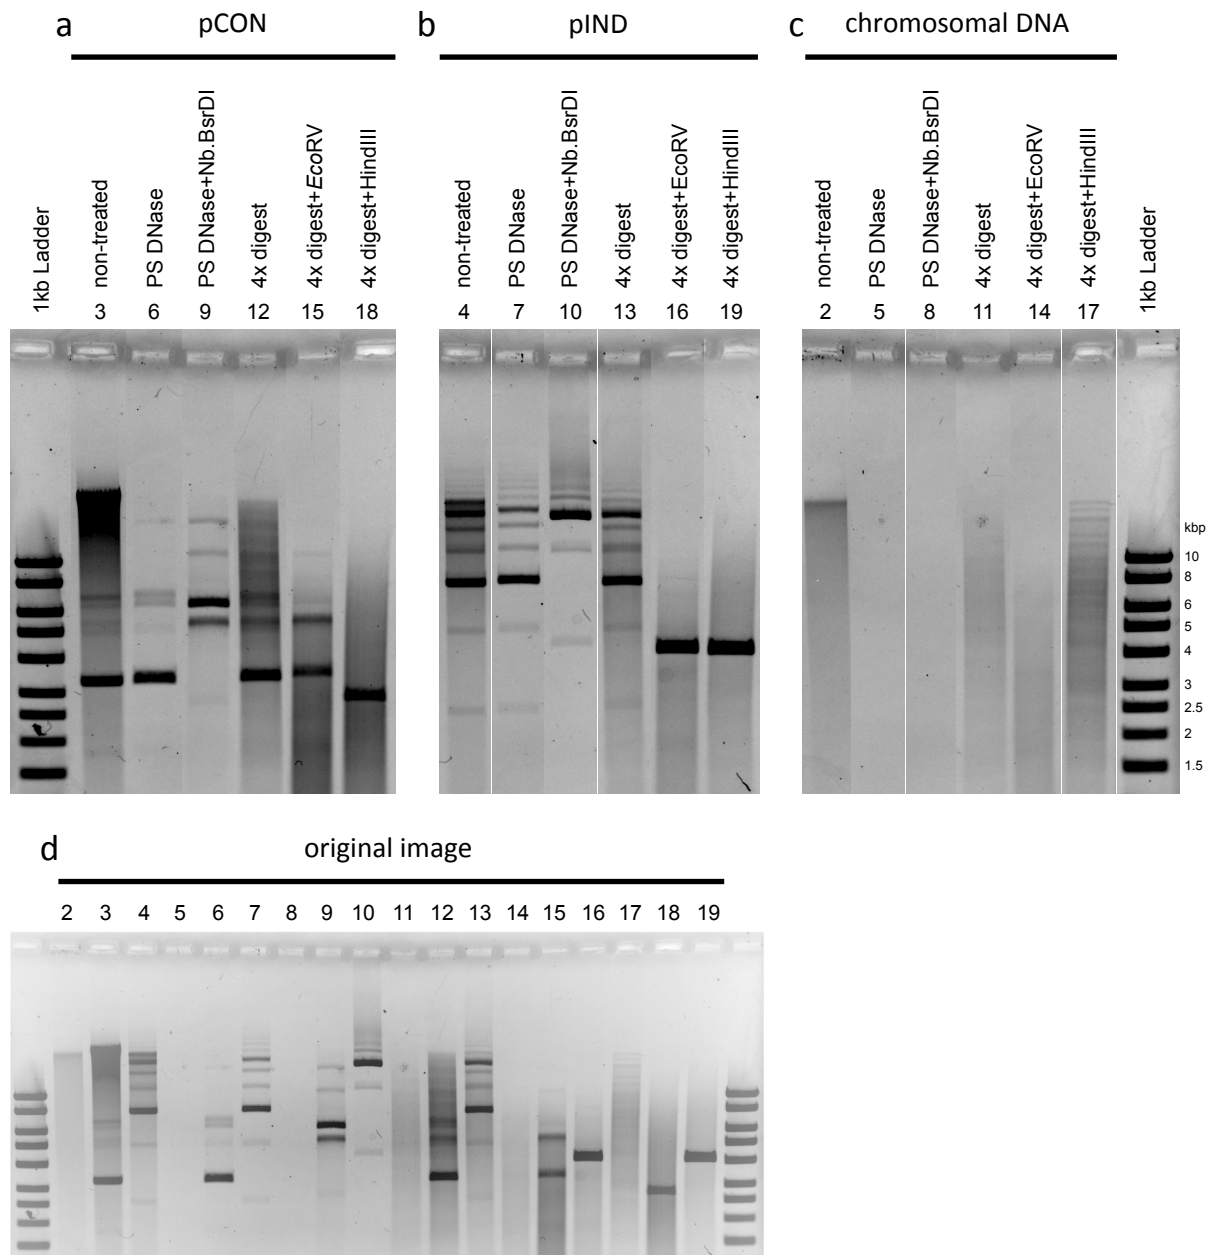

**Supplementary Figure 9.** Plasmid structures in ancestral plasmid DNA preparations of pCON and pIND. Representative plasmid preparations of pCON and pIND obtained from the ancestral *E. coli* lines (37°C regime) were assayed by native one-dimensional gel electrophoresis on a 0.7% agarose gel. Under this condition, supercoiled molecules (ccc), their nicked counterparts (oc) and linear fragments can be separated based on their size and mass. Treatment with Plasmid-Safe ATP-dependent DNase (PS-DNase) (Epicentre) was used to remove chromosomal DNA of the host from the samples. Open circular forms were obtained by nicking with Nb.BsrDI. Quadruple digests (4x digest) with *AscI*, *NotI*, *NdeI*, and *XhoI* (that do not cleave in pCON or pIND) were used to test for linear plasmid forms in the plasmid preparations. Treatments with *EcoRV* and *HindIII* in combination with the 4x digestion mix were used to produce linear plasmid monomers and to reduce the background signal of the chromosomal DNA in the samples. **a**, The high molecular weight DNA and DNA smear pattern obtained in a non-treated pCON plasmid preparation (lane 3) is comprised of linear double stranded DNA fragments (lane 6) of chromosomal origin (lane 12, 15, and 18).

Exonucleolytic removal of linear DNA (lane 3) reveals multimeric pCON molecules besides the dominating fraction of ccc pCON monomers. Nicked oc forms of pCON multimers confirm the presence of circular dimers and trimers of pCON (lane 9). **b**, Multiple plasmid isoforms of pIND comprising different ccc and oc forms are readily observable in a non-treated preparation and after removal of linear fragments (lanes 4, 7, and 13) of chromosomal origin (lanes 13, 16, and 19). Different oc forms of pIND obtained after nicking (lane 10) confirm the presence of multimers. **c**, Control reactions performed with chromosomal DNA of *E. coli* MG1655. **d**, Original image. The lane numbering in **a**, **b**, and **c** refers to the lane numbering of the original gel. **Supplementary methods for Supplementary Figure 9**. Plasmids were isolated from overnight cultures grown without antibiotic selection using the GeneJET Plasmid Miniprep kit (Thermo Fisher Scientific). Genomic DNA was prepared using the Wizard genomic DNA purification kit (Promega). Enzymatic reactions were performed according to the manufacturers' guidelines (Epicentre, New England Biolabs). The samples were electrophoresed for 130 min at 4.3 V per cm. Staining and image acquisition were performed as described in the main text. The relative mobility of identified plasmid bands in each lane was mapped against the linear size standard (lane 1 and 20) to estimate their topological form (ccc, oc, or linear).

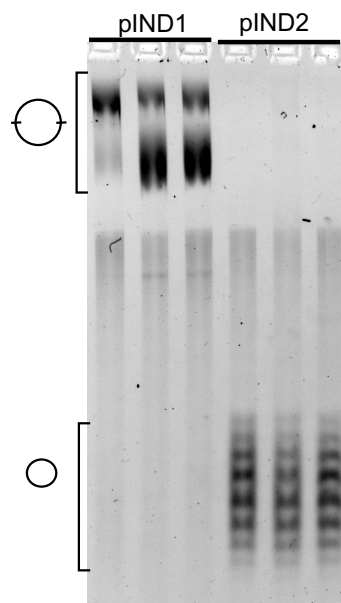

**Supplementary Figure 10.** Original chloroquine gel electrophoresis of pIND plasmid preparations of ancestral populations grown at 37°C. Symbols indicate plasmid topoisomers of multimers (large circle) and monomers (small circle).



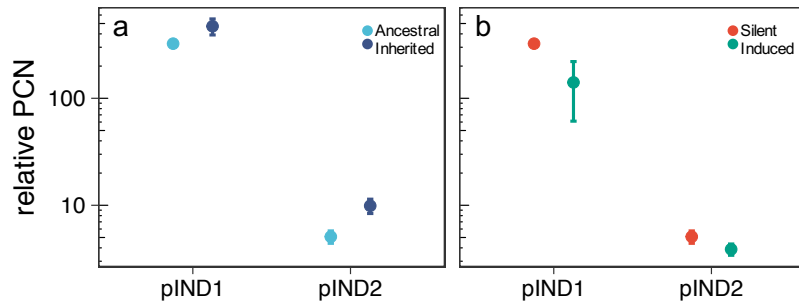

**Supplementary Figure 11.** The pIND copy number is heritable and is reduced upon induction plasmid gene transcription. The pIND replicates pIND1 and pIND2 correspond to pIND replicates in Fig. 3 and Fig. 4. **a**, Plasmids from pIND populations were re-introduced into naïve *E. coli* hosts. The relative plasmid copy number (PCN) was measured using qPCR (SE,  $n=3$  per population) and is presented in log-scale. **b**, pIND plasmid copy number before and after induction of *nptII* transcription. The relative PCN of the pIND populations was measured after growth in LB (red,  $n=3$ , SE). Thereafter, the populations were transferred into LB supplemented with 1% L-arabinose and the PCN was measured subsequently (purple,  $n=3$ , SE). Result of the statistical comparison is reported in the main text. Source data are provided as a Source Data File.

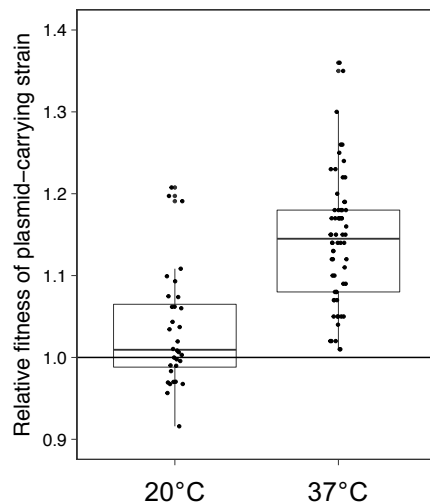

**Supplementary Figure 12.** Pairwise competition experiments between the plasmid-carrying (pIND) *E. coli* MG1655 and tagged wild-type ( $Tm'$ ). The experiments were conducted for 24 h in 20°C and in 37°C with eight biological replicates which were comprised of four technical replicates at 20°C ( $n=32$ ) and eight replicates at 37°C ( $n=64$ ). No significant fitness effect could be observed for the pIND plasmid (20°C:  $w=1.012$ ,  $H_0:w \geq 1$ ,  $P=0.01471$  using Wilcoxon test; 37°C:  $w=1.126$ ,  $H_0:w \geq 1$ ,  $P=1.766 \times 10^{-12}$  using Wilcoxon test). The temperature causes a different fitness impact of pIND on its host ( $P=1.609 \times 10^{-8}$  using Wilcoxon-test). We further tested the impact of the selective marker and did not detect an effect between calculated and measured values for pIND fitness ( $P=0.8919$  using Wilcoxon-test). The center value of the boxplots represents the median, the boxes denote the interquartile range, and the whiskers represent minimum and maximum values. Source data are provided as a Source Data File.

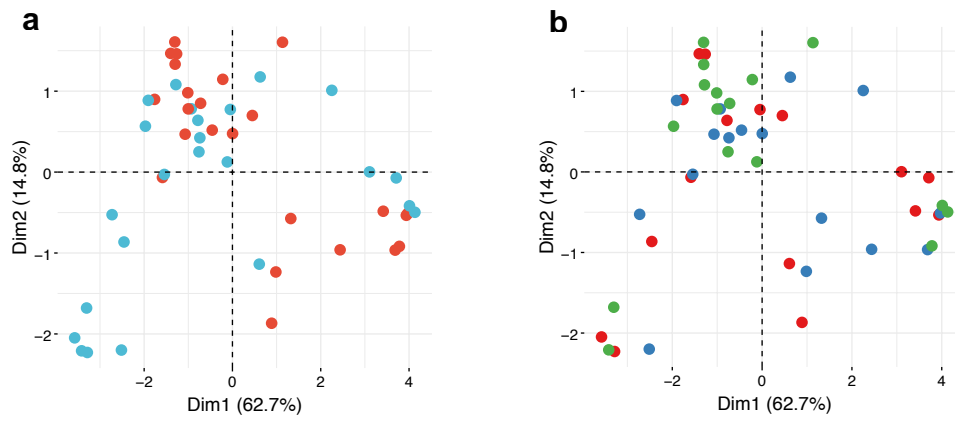

**Supplementary Figure 13.** Principal component analysis PCA of pIND host frequency over time. **a**, Effect of temperature on pIND host frequency over time. **b**, Effect of population bottleneck size on pIND host frequency over time.

## Supplementary tables

**Supplementary Table 1.** Linear regression analysis of pCON growth dynamics from the evolution experiment (Fig. 1A) using log transformed data.

| Temperature | Population Bottleneck | Linear equation    | y = 0 | R <sup>2</sup> | p-value                 |
|-------------|-----------------------|--------------------|-------|----------------|-------------------------|
| 37°C        | L                     | $y=4.69+(-0.04)x$  | 117   | 0.8461         | $2.2 \times 10^{-16}$   |
|             | M                     | $y=4.62+(-0.07)x$  | 66    | 0.7996         | $2.2 \times 10^{-16}$   |
|             | S                     | $y=4.36+(-0.053)x$ | 83    | 0.6475         | $3.252 \times 10^{-12}$ |
| 20°C        | L                     | $y=4.52+(-0.019)x$ | 237   | 0.2012         | 0.0005268               |
|             | M                     | $y=4.18+(-0.019)x$ | 220   | 0.1777         | 0.001499                |
|             | S                     | $y=4.66+(-0.017)x$ | 274   | 0.2786         | 4.881e-05               |

**Supplementary Table 2.** Data on genomic sequencing of evolved pCON plasmids.

| Population | Ref. size (Kb) | No. of reads | Mapped reads | Coverage (±SD) | Plasmid |
|------------|----------------|--------------|--------------|----------------|---------|
| pCON       | 2.601          | 362,005      | 28.5         | 6592±1652      |         |
| pCONS6     | 2.601          | 351,520      | 7.43         | 1511±518       |         |

**Supplementary Table 3.** Data on genomic sequencing of ancestral pIND populations. No differential variants could be detected between the two populations.

| Population | Ref. size (Mb) | No. of reads | Mapped reads | Coverage Chromosome (±SD) | Coverage Plasmid (±SD) | Derived PCN |
|------------|----------------|--------------|--------------|---------------------------|------------------------|-------------|
| pIND1      | 4.64           | 2,469,550    | 99.81%       | 68±17                     | 5347±959               | 79          |
| pIND2      | 4.64           | 1,914,564    | 99.95%       | 56±9                      | 134±26                 | 2.5         |

**Supplementary Table 4.** Phylogenetic analysis of pBBR1 Rep protein.

| Strain                                                                 | Strain isolation location | Plasmid genome sequence ID | Plasmid genome size (bp) | No. genes in plasmid genome | Rep homolog gene sequence ID | Similarity to pBBR1 Rep (%identical amino acids) |
|------------------------------------------------------------------------|---------------------------|----------------------------|--------------------------|-----------------------------|------------------------------|--------------------------------------------------|
| <i>Klebsiella pneumoniae</i> strain KSB2_1B                            | clinic                    | NZ_CP024505.1              | 3,012                    | 2                           | WP_099743376.1               | 78                                               |
| <i>Klebsiella pneumoniae</i> strain EuSCAPE_IT217                      | clinic                    | UKSJ01000049               | 3,115                    | 3                           | SYD79493.1                   | 78                                               |
| <i>Escherichia coli</i> strain OM01-11                                 | clinic                    | QSVV01000122               | 2,778                    | 4                           | RGO66925.1                   | 75                                               |
| <i>Shigella sonnei</i> strain 4028STDY6275141                          | clinic                    | UIQG01000241               | 3,087                    | 4                           | SVI62134.1                   | 73                                               |
| <i>Shigella sonnei</i> strain 4028STDY6275113                          | clinic                    | UDZO01000249               | 3,085                    | 4                           | SRS26994.1                   | 73                                               |
| <i>Burkholderiales</i> bacterium 21-58-4 04302015                      | wastewater                | NCAU01000378               | 1,246                    | 1                           | OYV47792.1                   | 71                                               |
| <i>Escherichia coli</i> strain CVA0815                                 | clinic                    | NFTC01000081               | 3,164                    | 3                           | RBU87737.1                   | 75                                               |
| <i>Salmonella enterica</i> subsp. <i>enterica</i> serovar Newport str. | clinic                    | JAMG01000017               | 2,890                    | 3                           | OXX93233.1                   | 75                                               |
| <i>Cronobacter sakazakii</i> strain 1218                               | clinic                    | JNDC01000107               | 2,690                    | 3                           | WP_013641249.1               | 66                                               |
| <i>Pseudomonas avellanae</i> strain R25260                             | plant                     | MLEG01000115               | 4,896                    | 6                           | POC98691.1                   | 65                                               |
| <i>Acidithiobacillus thiooxidans</i> A01                               | wastewater                | AZMO01000115               | 9,773                    | 12                          | WP_051488149.1               | 73                                               |
| <i>Acidithiobacillus thiooxidans</i> strain JYC-17                     | wastewater                | LWSD01000209               | 10,265                   | 15                          | OCX85502.1                   | 73                                               |
| <i>Acidiphilium</i> sp.                                                | wastewater                | NCBH01000069               | 5,360                    | 6                           | WP_083818739.1               | 66                                               |
| <i>Enterobacter cloacae</i> strain GEO_49_Up_A                         | wastewater                | QKOM01000204               | 2,797                    | 3                           | RWS52735.1                   | 82                                               |
| <i>Verminephrobacter eiseniae</i> EF01-2                               | animal                    | NC_008771.1                | 31,194                   | 43                          | WP_083758778.1               | 74                                               |
| <i>Acidiphilium multivorum</i> AIU301                                  | wastewater                | NC_015187.1                | 65,564                   | 68                          | WP_013641249.1               | 66                                               |

**Supplementary Table 5.** Oligonucleotides used in this study

| Name             | DNA sequence (5' to 3')                          |
|------------------|--------------------------------------------------|
| pBBR1_for        | GCGGCCACCGGCTGGCT                                |
| pBBR1_rev        | TACCGGCGCGGCAGCGTGACCC                           |
| nptII_gib_for    | GCGCCGGTAGATCTGCTCATGTTTGAAGCTTCACGCTGCCGCA      |
| nptII_gib_rev    | CGGTGGCCGCCAAAAAGGCCATCCGTCAGGTCAGAAGAACTCGT     |
| seq_pCON_var_for | CGACTGTGGCCGGCTGG                                |
| nptII_rev        | TCAGAAGAACTCGTCAAGAAGGCG                         |
| pCON-var_gib_for | TTCTTGACGAGTTCTTCTGACAGCGGCCACCGGCTGGCTCGCTTC    |
| pCON-var_gib_rev | GAGCCAGCCGGTGGCCGCTGTCAGAAGAACTCGTCAAGAAGGCGA    |
| pCON-ran_gib_for | CTTGACGAGTTCTTCTGACAGGCTCATACCCCTGCCG            |
| pCON-ran_gib_rev | CCAGCCGGTGGCCGCTGCGCATCGTGACGGCC                 |
| pBAD_gib_for     | TCACGCTGCCGCGCCGGTAGTTATGACAACTTGACGGCTACATCATTC |
| pBAD_gib_rev     | GCGAGCCAGCCGGTGGCCGCCAAAAAGGCCATCCGTCAGG         |
| q_idnT_F         | GTGGGTTTTGTCCTGCTGTT                             |
| q_idnT_R         | ACAGAGAGCGCTGCTACCAT                             |
| q_nptII_F        | GCTCCTGCCGAGAAAGTATC                             |
| q_nptII_R        | TCATCCTGATCGACAAGACC                             |
| q_pBB_F          | CACGAGGTGATGCAGCAG                               |
| q_pBB_R          | GGCCACGCAGTCCAGAG                                |
